# Supplementary material for: Impact of carbon inputs on soil carbon fractionation, sequestration and biological responses under major nutrient management practices for rice-wheat cropping systems
Source: Springer Nature journal article supplement (doi:10.1038/s41598-019-45534-z), 2019-06-24
Supplement: 41598_2019_45534_MOESM1_ESM.pdf [file 41598_2019_45534_MOESM1_ESM.pdf]

## Supplementary Information

### Impact of carbon inputs on soil carbon fractionation, sequestration and biological responses under major nutrient management practices for rice-wheat cropping systems

Ajay Kumar Bhardwaj<sup>\*1</sup>, Deepika Rajwar<sup>1</sup>, Uttam Kumar Mandal<sup>2</sup>, Sharif Ahamad<sup>1</sup>, Bhumija Kaphaliya<sup>1</sup>, Paramjit Singh Minhas<sup>1</sup>, Mathyam Prabhakar<sup>3</sup>, Rakesh Banyal<sup>1</sup>, Ranbir Singh<sup>1</sup>, Suresh Kumar Chaudhari<sup>4</sup>, Parbodh Chander Sharma<sup>1</sup>

<sup>1</sup> ICAR-Central Soil Salinity Research Institute (CSSRI), Karnal 132001, Haryana, India.

<sup>2</sup> CSSRI Regional Research Station, Canning Town 743329, West Bengal, India.

<sup>3</sup> ICAR-Central Research Institute for Dryland Agriculture, Hyderabad 500059, Telangana, India.

<sup>4</sup> Krishi Anusandhan Bhawan –II, Pusa, New Delhi 110012, India.

#### Corresponding author:

Ajay Kumar Bhardwaj, Principal Scientist

#### Address:

ICAR-Central Soil Salinity Research Institute, Kachhwa Road, Karnal 132001, Haryana, India.

Tel: (+91) 184-2209359, Fax: (+91) 184-2290480, E-mail: [ak.bhardwaj@icar.gov.in](mailto:ak.bhardwaj@icar.gov.in),

[ajaykbhardwaj@gmail.com](mailto:ajaykbhardwaj@gmail.com)

22 Table S1. Fertilizer nutrients and organic inputs under different nutrient management systems.

23

| Nutrient management | Crop cycle                                       |             |            | Fertilizer/ organic inputs                         |                       |                                                        |              |
|---------------------|--------------------------------------------------|-------------|------------|----------------------------------------------------|-----------------------|--------------------------------------------------------|--------------|
|                     |                                                  |             |            | Rice (at transplanting)                            |                       | Wheat (at sowing)                                      |              |
|                     | May to June                                      | July to Oct | Nov to Apr | Inorganic Fertilizer (N: P: K) kg ha <sup>-1</sup> | Organic               | Inorganic Fertilizer (N: P: K: Zn) kg ha <sup>-1</sup> | Organic      |
| <b>O</b>            | Fallow                                           | Rice        | Wheat      | -                                                  | -                     | -                                                      | -            |
| <b>F</b>            | Fallow                                           | Rice        | Wheat      | 180: 26: 42                                        | -                     | 180: 26: 42: 7                                         | -            |
| <b>LE</b>           | Opportunity legume crop ( <i>Vigna radiata</i> ) | Rice        | Wheat      | 100: 16: 28                                        | Legume crop biomass   | 100: 16: 28: 0                                         | -            |
| <b>GM</b>           | Green manure crop ( <i>Sesbania aculeata</i> )   | Rice        | Wheat      | 100: 16: 28                                        | Green manure biomass  | 100: 16: 28: 0                                         | -            |
| <b>FYM</b>          | Fallow                                           | Rice        | Wheat      | 100: 16: 28                                        | Farmyard manure (FYM) | 100: 16: 28: 0                                         | -            |
| <b>WS</b>           | Fallow                                           | Rice        | Wheat      | 100: 16: 28                                        | Wheat stubble         | 100: 16: 28: 0                                         | -            |
| <b>RS</b>           | Fallow                                           | Rice        | Wheat      | 100: 16: 28                                        | -                     | 100: 16: 28: 0                                         | Rice stubble |

24

25

26 Table S2. Carbon and nitrogen concentrations of different materials used as organic amendments  
 27 under different nutrient management.

| <b>Management</b> | <b>Organic amendment</b>                              | <b>Nitrogen<br/>concentration<br/>(%)</b> | <b>Carbon<br/>Concentration<br/>(%)</b> | <b>C:N</b>  |
|-------------------|-------------------------------------------------------|-------------------------------------------|-----------------------------------------|-------------|
| <b>LE</b>         | Green gram ( <i>Vigna radiata</i> ) biomass           | 1.71±0.02                                 | 47.78±1.07                              | 27.95±0.77  |
| <b>GM</b>         | Green manure<br>( <i>Sesbania esculenta</i> ) biomass | 2.65±0.02                                 | 42.32±1.13                              | 15.99±0.32  |
| <b>FYM</b>        | Farmyard manure                                       | 0.56±0.04                                 | 31.36±0.92                              | 56.53±4.36  |
| <b>WS</b>         | Wheat straw                                           | 0.27±0.01                                 | 41.90±0.55                              | 157.78±7.77 |
| <b>RS</b>         | Rice straw                                            | 0.46±0.01                                 | 42.42±0.33                              | 93.10±3.48  |

28

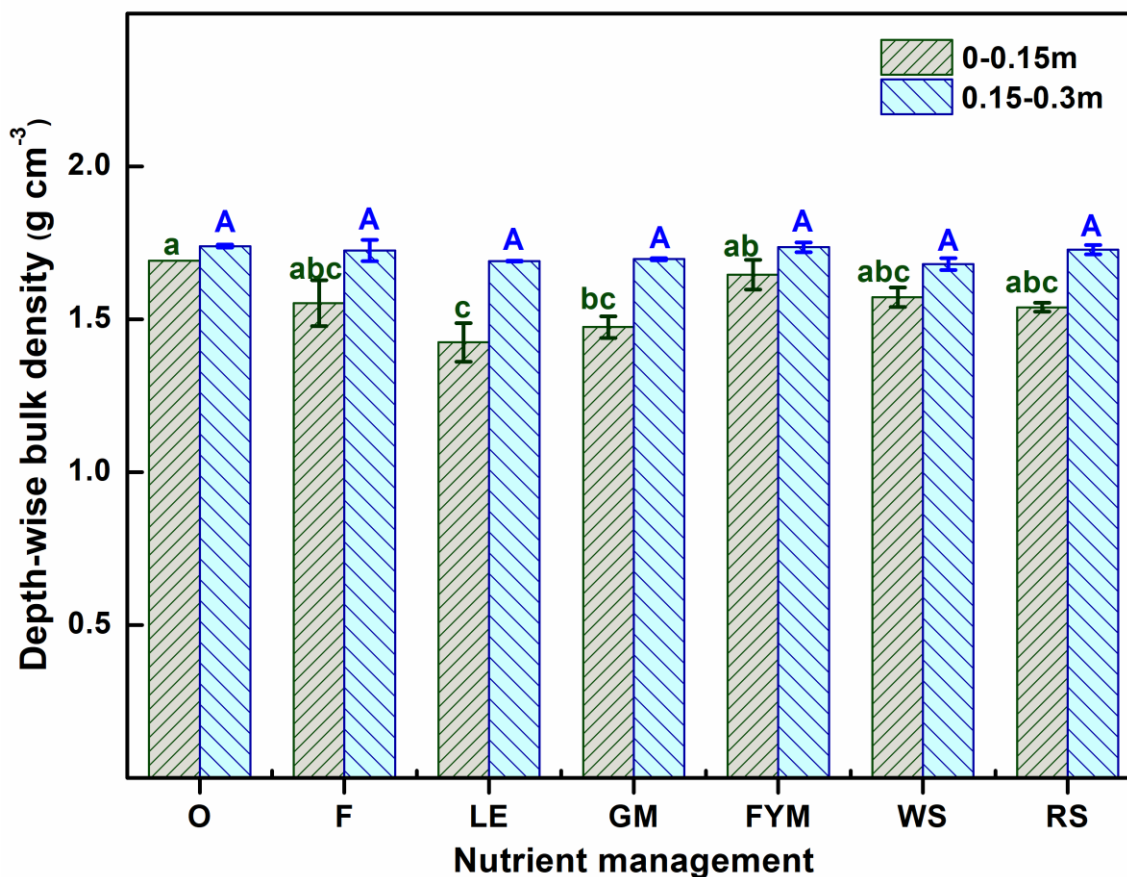

29  
 30  
 31  
 32 Fig. S1: Soil bulk density at different depths under different nutrient management after 10 years  
 33 of initiation. O= no fertilizer, F=100% inorganic fertilizers, LE= opportunity legume crop (*Vigna*  
 34 *radiata*) biomass incorporation, GM=green manuring, FYM=farmyard manure, WS= 30 cm  
 35 wheat stubble retention and soil incorporation, RS= rice stubble retention and soil incorporation.  
 36 Error bars denote  $\pm 1$  SE. Treatments with same letters are not significantly different at  $p < 0.05$ .
